# Supplementary material
Source: PubMed Central journal article supplement (PMC6284444)
Supplement: JOA-234-16-s008.pdf [file JOA-234-16-s008.pdf]

| <b>Locus</b>  | <b>Forward base primer</b> | <b>Reverse base primer</b> | <b>PCR products [bp]</b> | <b>NCBI ID</b> |
|---------------|----------------------------|----------------------------|--------------------------|----------------|
| <i>Acan</i>   | AAGCAACAGAGGAGCACACA       | CTGGGGCTGAAAGTGTGGAT       | 426                      | NM_173981.2    |
| <i>Bgn</i>    | GTCAACGACTTCTGCCAGT        | AACAACCGACCTCAGAAGCA       | 1064                     | NM_178318.4    |
| <i>Chm1</i>   | GGCGCTGTGAAGAAGTCAAAC      | AGCAGACCTTCCTGGCAAAG       | 255                      | M65081.1       |
| <i>Colla1</i> | GGGGCAAGACAGTGATCGAA       | TTGGCTTTTCGGGGGTTCA        | 229                      | NM_001034039.2 |
| <i>Colla2</i> | CATCTCGCCTGCCTATCCTTG      | GGTGTGGATCACACTCACAGG      | 514                      | NM_174520.2    |
| <i>Col2a1</i> | TCACAGAAGACCTCCCGTCT       | GCACAAAGCACAAAGCCAGTA      | 561                      | NM_001001135.2 |
| <i>Dcn</i>    | CCACCCGGATACAACACCAA       | ACAAACATCAAAGGACAGGGGT     | 801                      | NM_173906.4    |
| <i>Fmod</i>   | AGGAGAAGCCAAGGCGTATG       | GGTTGGGTTAGCCACCACTC       | 938                      | NM_174058.2    |
| <i>Hspg2</i>  | ACCAGGACACGGGGTTAGG        | AAGACAAAGACCACAGGAGGG      | 815                      | XM_010826689.2 |
| <i>Krt8</i>   | AGGGTGACCCAGAAGTCCTA       | GATGTTGGGATCCACCTCCA       | 264                      | NM_001033610.1 |
| <i>Krt18</i>  | GTTGCGGACCTCACACTC         | TGACCTGGGGTCCCTTCTTC       | 439                      | NM_001192095.1 |
| <i>Krt19</i>  | CAGGCGCTGATCAGTGGTAT       | TTTATTGGCAGGTCAGGGGG       | 300                      | NM_001015600.3 |
| <i>Lam1</i>   | GAAGCAGAAGTGCCTGAGCA       | TGAAATACTGAACCTGAGTTGGA    | 272                      | XM_015460117.1 |
| <i>Tln1</i>   | GAGATGCTTCGGAAGGAACGA      | TGACCTGTTTGGGGCTTACAC      | 512                      | XM_010807953.1 |
| <i>Tnmd</i>   | AAGGTGGAGAAGACCCGTCA       | AAACCCTCCCTAGCATGCGG       | 766                      | NM_001099948.1 |
| <i>Tnxb</i>   | GTCTCCATGGCGTGTGTTGAC      | CACGCATACGCCGTTCTCG        | 923                      | NM_174703.2    |
| <i>Foxf1</i>  | AGCATGTGTGACCGAAAGGA       | TAAACGGAGGAGCCTATGCG       | 1168                     | XM_002694754.3 |
| <i>Gli1</i>   | ACTGGGTAGGCATGTTTGGG       | GACAGCCGGTCTACAACCTC       | 822                      | XM_005206588.1 |
| <i>Gli3</i>   | CGAACAGAAGCGACCTGTCT       | TCGGATTTACTGGCATCGGG       | 1012                     | XM_005205659.1 |
| <i>MyoD</i>   | AGCAAGTTTCTGGCAACCCT       | TTCGATATAGCGGATGGCGT       | 549                      | NM_001040478.2 |
| <i>Noto</i>   | AGATGCGGAGTCAGGAATGG       | ATGCCAGTTTTGGCAAAGGC       | 782                      | XM_002691214.2 |
| <i>Pax1</i>   | CTCTCCTCTCCCCTCACTCT       | ATTGCGCAGAATACGGCTGA       | 421                      | XM_002692159.3 |
| <i>Pax9</i>   | ATCCGGCTTCGCATAGTGG        | GTGCTGCTTGTAGGAGTCGT       | 366                      | NM_001192369.1 |
| <i>Scx</i>    | GGACAGAAAGACGGCGATCC       | GCGTTTGAAGATACTGTTTTGT     | 318                      | XM_866422.3    |
| <i>Sox5</i>   | CACAGATCCCCATCGCCAC        | CAGTGCTTGGATGTAGCAGC       | 574                      | NM_001083471.1 |
| <i>Sox6</i>   | TGTTTGTGCTGTGTGAGGGT       | TTTAGTTCCGGCTCGTGAGGG      | 507                      | XM_005216012.1 |
| <i>Sox9</i>   | TTAAAGAGCCGCTGGACTGG       | ATATAGGCGTTCATGGGCCG       | 734                      | XM_005221337.1 |
| <i>T</i>      | GCAGTGTGTTGAGCGGCAGTC      | AGCAAACATTCTAGCAGGCAGAG    | 503                      | XM_005211110.1 |
| <i>Bmp4</i>   | CGAGGTGATCTCGTCTGCC        | GTTCGGTGGGAACACAACAG       | 683                      | NM_001045877.1 |
| <i>Gdf5</i>   | GGTCAGGAAGCAGAGGTACG       | TTGTTGGCCGAGTCGATGAA       | 804                      | NM_001192273.1 |
| <i>Ihh</i>    | TTCTACTGCCCTCCAGAACT       | CAAATTTTCCCATGGGCTTCCC     | 710                      | NM_001076870.2 |
| <i>Shh</i>    | GCTCTCAGGCTTGCTACCAT       | TGTCGGGGTTGTAATTGGGG       | 571                      | XM_002686985.2 |
| <i>Eng</i>    | TCCTCGGAGAGCAGTAGCA        | ATATAGGGGAGGACCCAGGAC      | 696                      | NM_001076397   |

|                     |                        |                        |      |                |
|---------------------|------------------------|------------------------|------|----------------|
| <i>Esrrb</i>        | TCGAGGATTTGGAGGCAGTC   | GGTCCATCCGTCTGTCTTG    | 281  | XM_010809669.2 |
| <i>Nanog</i>        | AGACCTGGAATAACCCACG    | ACAAACCAGCCAACTGGTA    | 837  | NM_001025344.1 |
| <i>Oct4</i>         | GACACCTCGCTTCTGACTTCG  | CCCTCGGAGTTGCTCTCCAC   | 319  | NM_174580.2    |
| <i>Sox2</i>         | CCGAGTGGAAACTTTTGTCCG  | CCATGCTGTTTCTTGCTGTCC  | 808  | NM_001105463.2 |
| <i>Thy1</i>         | AGTCTTACAGGTGGCCCGT    | TTGGAGACGGAGGGATTCCG   | 315  | NM_001034765.1 |
| <i>Ptprc</i>        | TTGCTAGCACCTATCCTGCC   | TGGCAAAGTTTCTCAGAGCATT | 609  | NM_001206523.1 |
| <i>Zscan10</i>      | TCGGACCCGGAGTTCAAGTT   | AGACCTTGCCACACTCTGGG   | 1195 | NM_001192113.1 |
| <i>Ca12</i>         | TTACAGGTGAGAACGTGCGG   | CGAGTCCCCTGTAACCTCTGC  | 1447 | XM_005211746.1 |
| <i>Hif1a</i>        | TCCTCAGAGTGCAAGCACA    | GCGACAGATAACACATTAGGGC | 306  | NM_174339.3    |
| <i>Gapdh</i>        | TGGTACGACAATGAATTTGGCT | CCTCAGGGCCTTAGAGATGG   | 203  | NM_001034034.2 |
| <i>LdhA</i>         | GTGCAGATACACTTTGGGGGA  | AGAACAGTTTAGCACATGGCA  | 510  | NM_174099.2    |
| <i>LdhB</i>         | GAGCCTTCCGTGTATCCTGA   | GCAAGCATGGGCTTTGATTCT  | 282  | NM_001316338.1 |
| <i>LOC101904175</i> | TCAAGCGCTCTGTGCAATATG  | TTGCATGCTAAGCAGGGTCA   | 625  | XR_001499396.1 |
| <i>Mdh2</i>         | AATCTAGGCATCGGCAAGGTC  | GACCAAGATTGCAAAGGGTG   | 255  | NM_001013587.1 |
| <i>Anxa4</i>        | ACGCCTACAGATGCCTCCTA   | GTTGAAAGCCACAGTGCAAGT  | 811  | NM_001001440.2 |
| <i>Ki67</i>         | CGAGCCTCAGAGCTGAAGTG   | GACTGGCTCCGGTTGAGAAG   | 915  | XM_015469655.1 |
| <i>Snap25</i>       | AACCTGCCCCATTGTGAAT    | CACAGCAAGGTCGCTTTCTC   | 819  | NM_001076246.1 |
